# Supplementary material for: Does the Effect of Micro-Environmental Factors on a Street’s Appeal for Adults’ Bicycle Transport Vary across Different Macro-Environments? An Experimental Study
Source: PubMed Central journal article supplement (PMC4552783; doi:10.1371/journal.pone.0136715), 2015-08-28

# S1 File

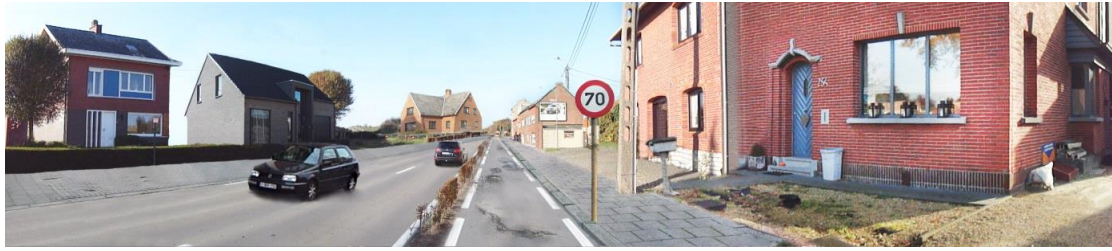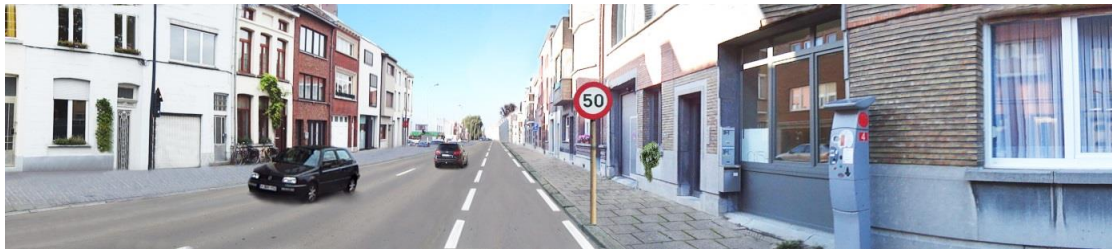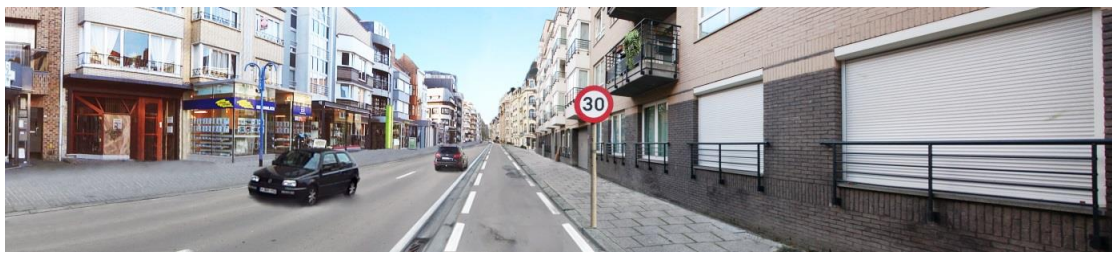

Supplement: pone.0136715.s001.pdf [file pone.0136715.s001.pdf]
